# Supplementary material
Source: PubMed Central journal article supplement (PMC4676757)
Supplement: supp_WNL.0000000000002193_e-References.pdf [file supp_WNL.0000000000002193_e-References.pdf]

## E-REFERENCES

- e1. Hashimoto M, Ishikawa M, Mori E, Kuwana N, Study of Ioni. Diagnosis of idiopathic normal pressure hydrocephalus is supported by MRI-based scheme: a prospective cohort study. *Cerebrospinal Fluid Res* 2010;7:18.
- e2. Klinge P, Hellstrom P, Tans J, Wikkelso C, European i NPHMSG. One-year outcome in the European multicentre study on iNPH. *Acta Neurol Scand* 2012;126:145–153.
- e3. McGirt MJ, Woodworth G, Coon AL, Thomas G, Williams MA, Rigamonti D. Diagnosis, treatment, and analysis of long-term outcomes in idiopathic normal-pressure hydrocephalus. *Neurosurgery* 2005;57:699–705; discussion 699–705.
- e4. Golomb J, Wisoff J, Miller DC, et al. Alzheimer's disease comorbidity in normal pressure hydrocephalus: prevalence and shunt response. *J Neurol Neurosurg Psychiatry* 2000;68:778–781.
- e5. Burnett MG, Sonnad SS, Stein SC. Screening tests for normal-pressure hydrocephalus: sensitivity, specificity, and cost. *J Neurosurg* 2006;105:823–829.
- e6. Walchenbach R, Geiger E, Thomeer RT, Vanneste JA. The value of temporary external lumbar CSF drainage in predicting the outcome of shunting on normal pressure hydrocephalus. *J Neurol Neurosurg Psychiatry* 2002;72:503–506.
- e7. Vanneste JA. Diagnosis and management of normal-pressure hydrocephalus. *J Neurol* 2000;247:5–14.
- e8. Schwalb JM, Jankowski M, Schultz L, Nerenz D. Surgical treatment of idiopathic normal pressure hydrocephalus (iNPH) in the United States: 2003-2009. Congress of Neurological Surgeons 2012 Annual Meeting. Chicago, IL, October 6–10, 2012.
